# Supplementary material
Source: publisher figshare collection journal article supplement (https://brill.figshare.com/ndownloader/files/17907818)
Supplement: Supplementary file 1 [file 17907818]

# **Age-Related Effects on Cross-Modal Duration Perception**

**Alexandra N. Scurry<sup>1,\*</sup>, Dustin Dutcher<sup>1</sup>, John S. Werner<sup>2</sup> and Fang Jiang<sup>1</sup>**

<sup>1</sup> Department of Psychology, University of Nevada, Reno, NV 89557, USA

<sup>2</sup> Department of Ophthalmology and Vision Science, University of California, Davis Medical Center,  
Sacramento, CA 95817, USA

Received 15 March 2019; accepted 30 August 2019

\* To whom correspondence should be addressed. E-mail: [ascurry@unr.edu](mailto:ascurry@unr.edu)

**Supplementary Material**

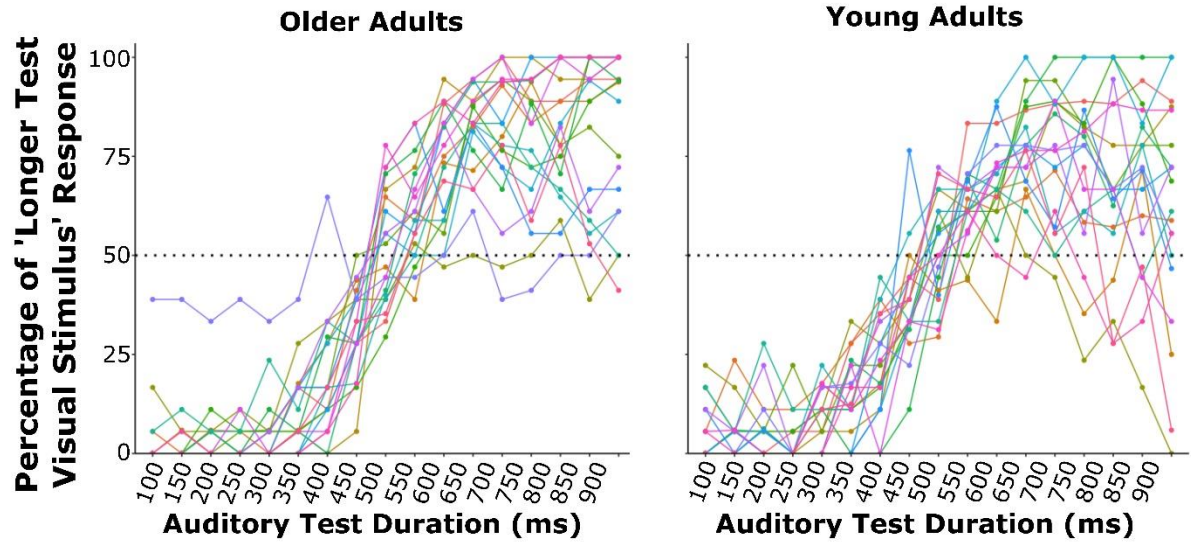

**Figure S1.** Individual variability in perceptual compression and expansion independent of trial order. The percentage of the test V stimulus reported as longer than the standard V stimulus is plotted for each participant from the older (left panel) and younger (right panel) group. Data are from both standard-first and test trials combined. Individuals are color-coded.

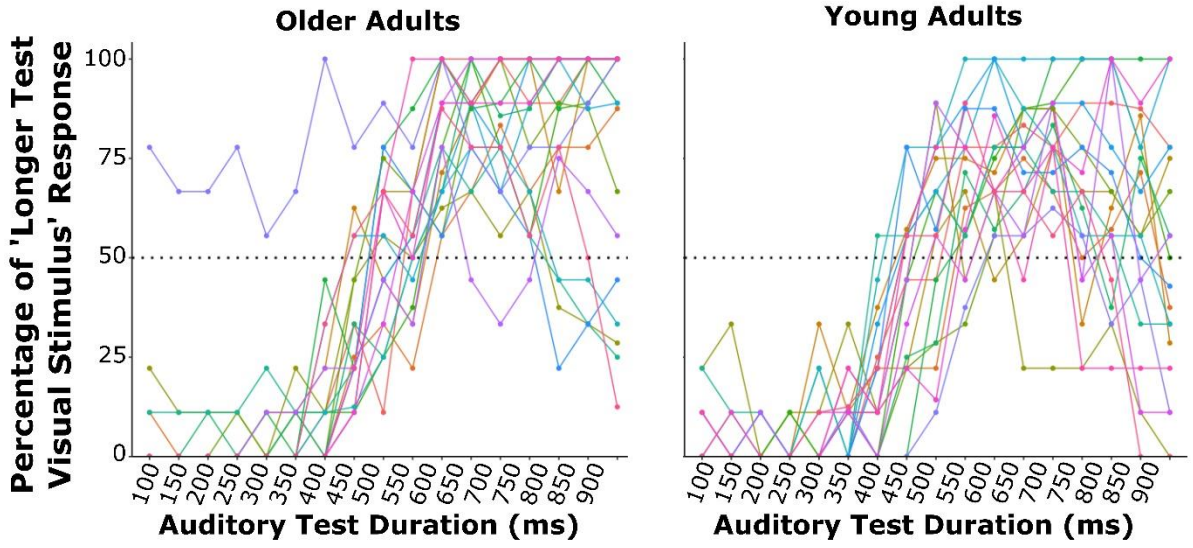

**Figure S2.** Individual variability in perceptual compression and expansion for standard-first trials. The percentage of the test V stimulus reported as longer than the standard V stimulus is plotted for each participant from the older (left panel) and younger (right panel) group for standard-first trials. Individuals are color-coded.

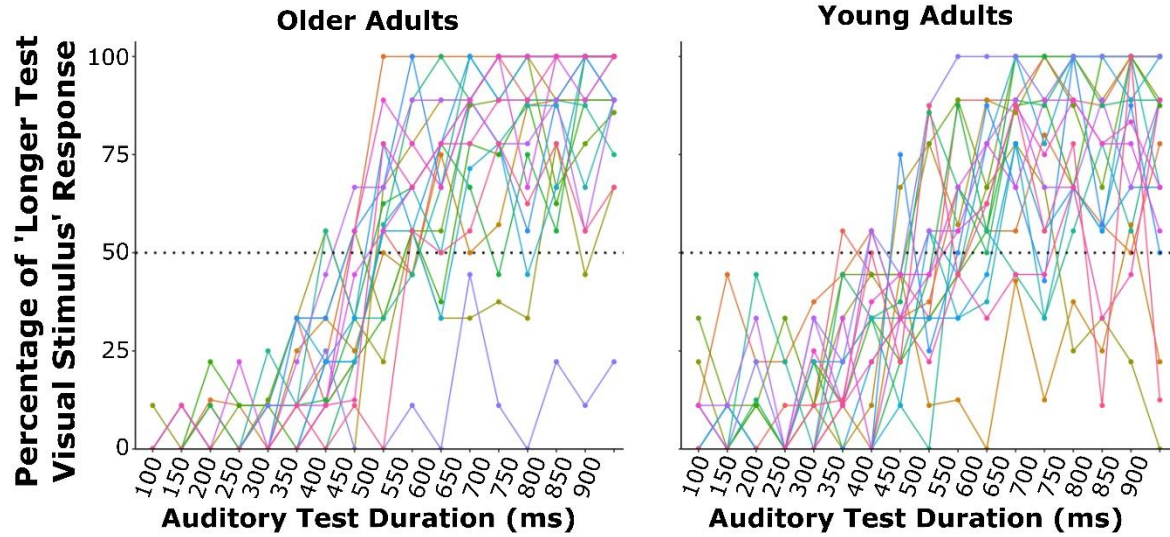

**Figure S3.** Individual variability in perceptual compression and expansion for test first trials.

The percentage of the test V stimulus reported as longer than the standard V stimulus is plotted for each participant from the older (left panel) and younger (right panel) group for standard-first trials. Individuals are color-coded.
